# Supplementary material for: Impact of insulin-like growth factor-1 receptor and amphiregulin expression on survival in patients with stage II/III gastric cancer enrolled in the Adjuvant Chemotherapy Trial of S-1 for Gastric Cancer
Source: PubMed Central journal article supplement (PMC5321694; doi:10.1007/s10120-016-0600-x), 2016-02-16
Supplement: 10120_2016_600_MOESM1_ESM.pdf [file 10120_2016_600_MOESM1_ESM.pdf]

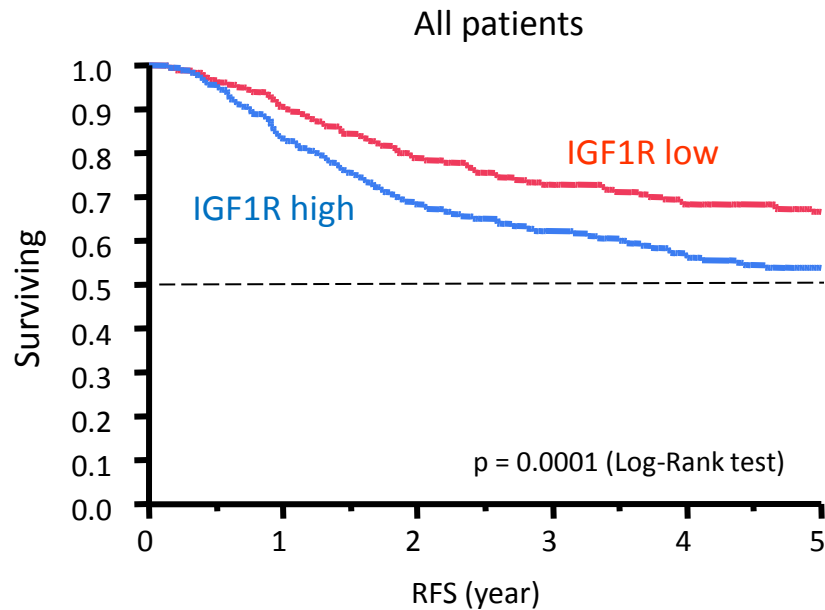

**Supplemental Figure S1.** Kaplan-Meier curves showing RFS for all patients according to *IGF1R* expression. RFS was poorer in high *IGF1R* tumors.

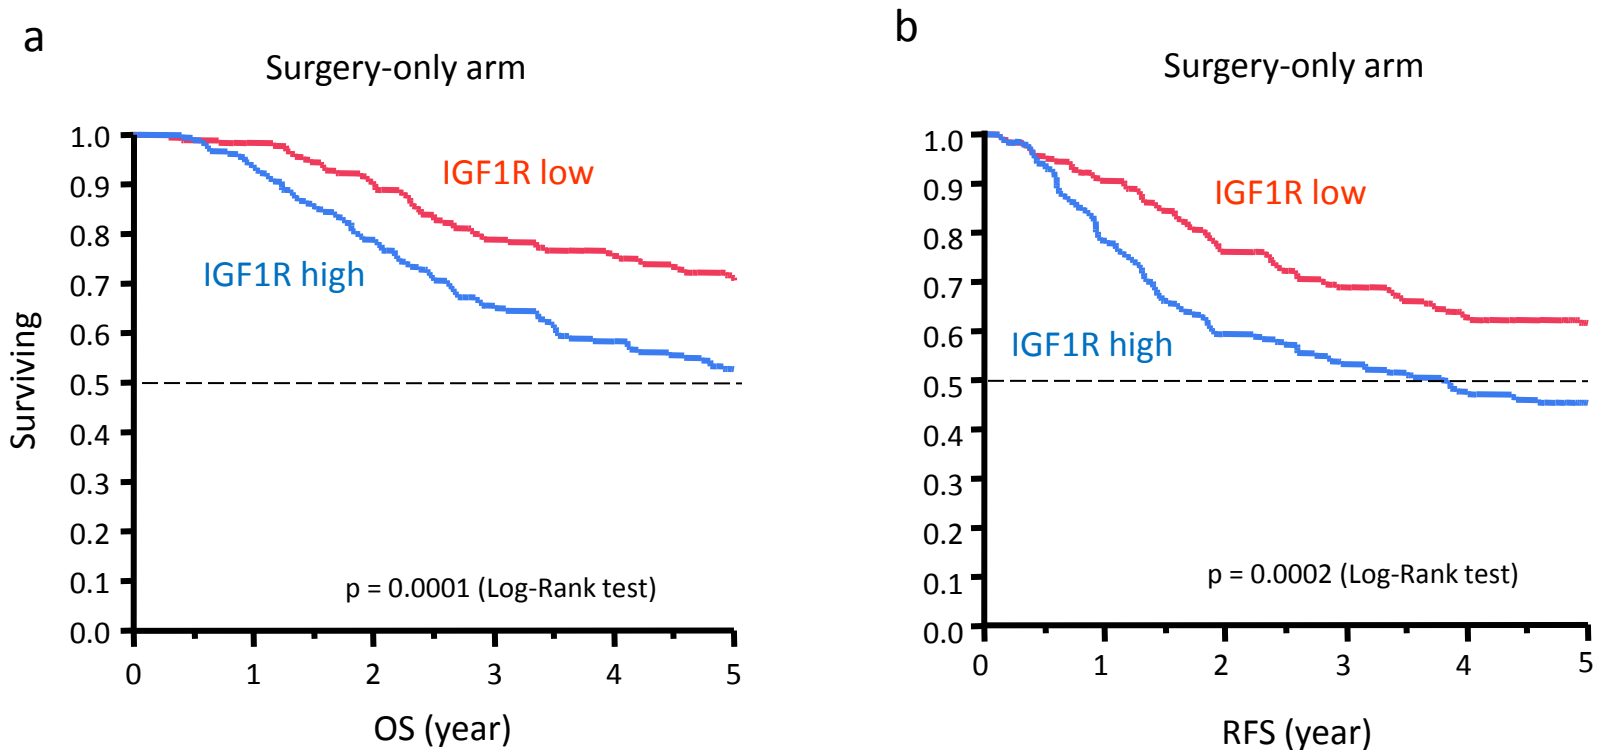

**Supplemental Figure S2.** Kaplan-Meier curves showing OS or RFS for patients in surgery-only arm according to *IGF1R* expression. OS (a) and RFS (b) in groups with tumors according to *IGF1R* expression. OS and RFS were poorer in high *IGF1R* tumors.

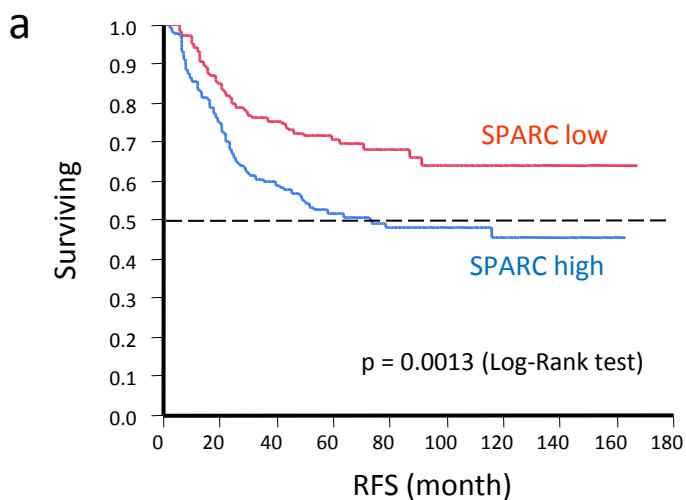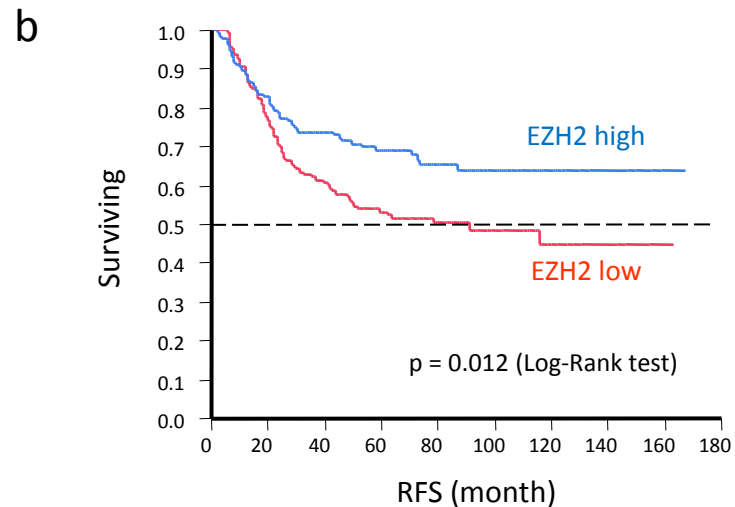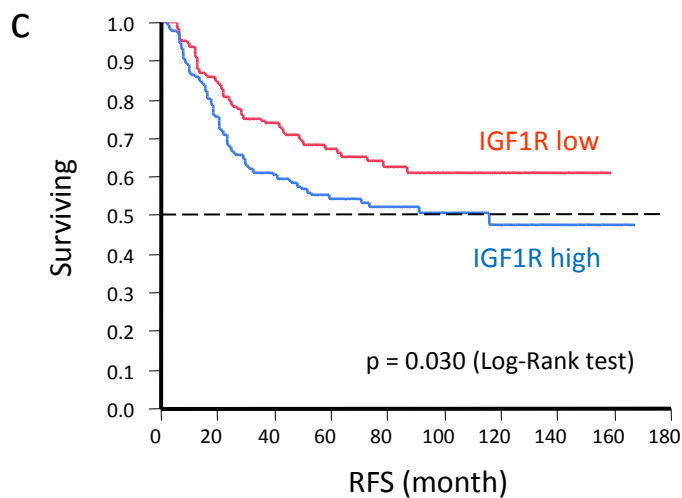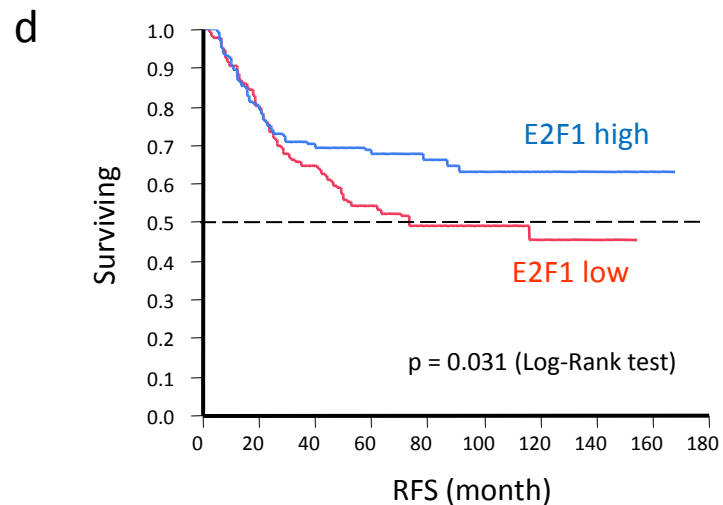

**Supplemental Figure S3.** Kaplan-Meier curves showing RFS for all patients according to *SPARC* (a), *EZH2* (b), *IGF1R* (c), and *E2F1* (d) expression from the GSE26253 data set. RFS was worse in tumors with high *SPARC* or *IGF1R* and low *EZH2* or *E2F1*.
