# Supplementary material for: Impact of insulin-like growth factor-1 receptor and amphiregulin expression on survival in patients with stage II/III gastric cancer enrolled in the Adjuvant Chemotherapy Trial of S-1 for Gastric Cancer
Source: PubMed Central journal article supplement (PMC5321694; doi:10.1007/s10120-016-0600-x), 2016-02-16
Supplement: 10120_2016_600_MOESM2_ESM.pdf [file 10120_2016_600_MOESM2_ESM.pdf]

# Table S1 Assay IDs of Low Density Array

| Assay ID      | Gene Symbol    | Gene Name                                                    | Amplicon size (bp) | Assay ID      | Gene Symbol    | Gene Name                                                                             | Amplicon size (bp) |
|---------------|----------------|--------------------------------------------------------------|--------------------|---------------|----------------|---------------------------------------------------------------------------------------|--------------------|
| Hs03929097_g1 | <i>GAPDH</i>   | glyceraldehyde-3-phosphate dehydrogenase                     | 58                 | Hs00171254_m1 | <i>IGF2</i>    | insulin-like growth factor 2                                                          | 93                 |
| Hs00184500_m1 | <i>ABCB1</i>   | ATP-binding cassette; sub-family B (MDR/TAP); member 1       | 67                 | Hs01001469_m1 | <i>ITGB3</i>   | beta 3 (platelet glycoprotein IIIa; antigen CD61)                                     | 59                 |
| Hs00219905_m1 | <i>ABCC1</i>   | ATP-binding cassette; sub-family C (CFTR/MRP); member 1      | 74                 | Hs00855332_g1 | <i>LDHA</i>    | lactate dehydrogenase A                                                               | 130                |
| Hs00357333_g1 | <i>ACTB</i>    | actin; beta;                                                 | 77                 | Hs00182031_m1 | <i>LRP5</i>    | low density lipoprotein receptor-related protein 5                                    | 73                 |
| Hs00169867_m1 | <i>ANGPT2</i>  | angiopoietin 2                                               | 73                 | Hs00902194_m1 | <i>MAPT</i>    | microtubule-associated protein tau                                                    | 59                 |
| Hs00181051_m1 | <i>APC</i>     | adenomatous polyposis coli                                   | 62                 | Hs01037698_m1 | <i>MGMT</i>    | O-6-methylguanine-DNA methyltransferase                                               | 71                 |
| Hs00950669_m1 | <i>AREG</i>    | amphiregulin                                                 | 66                 | Hs00179866_m1 | <i>MLH1</i>    | mutL homolog 1; colon cancer; nonpolyposis type 2 (E. coli)                           | 103                |
| Hs00180269_m1 | <i>BAX</i>     | BCL2-associated X protein                                    | 62                 | Hs01114487_m1 | <i>MTHFR</i>   | methylenetetrahydrofolate reductase (NAD(P)H)                                         | 87                 |
| Hs99999018_m1 | <i>BCL2</i>    | B-cell CLL/lymphoma 2                                        | 76                 | Hs03005094_m1 | <i>MUC2</i>    | mucin 2; oligomeric mucus/gel-forming                                                 | 64                 |
| Hs00375807_m1 | <i>BCL2L11</i> | BCL2-like 11 (apoptosis facilitator)                         | 64                 | Hs00169777_m1 | <i>PECAM1</i>  | platelet/endothelial cell adhesion molecule 1                                         | 65                 |
| Hs00971716_m1 | <i>CAV1</i>    | caveolae protein; 22kDa                                      | 66                 | Hs01047228_m1 | <i>PLA2G2A</i> | phospholipase A2; group IIA (platelets; synovial fluid)                               | 84                 |
| Hs99999189_m1 | <i>CDKN2A</i>  | cyclin-dependent kinase inhibitor 2A                         | 72                 | Hs01547054_m1 | <i>PLAU</i>    | plasminogen activator; urokinase                                                      | 61                 |
| Hs00234480_m1 | <i>DAPK1</i>   | death-associated protein kinase 1                            | 76                 | Hs02621230_s1 | <i>PTEN</i>    | phosphatase and tensin homolog                                                        | 135                |
| Hs00758822_s1 | <i>DHFR</i>    | dihydrofolate reductase                                      | 75                 | Hs00153133_m1 | <i>PTGS2</i>   | prostaglandin-endoperoxide synthase 2 (prostaglandin G/H synthase and cyclooxygenase) | 75                 |
| Hs00559278_m1 | <i>DPYD</i>    | dihydropyrimidine dehydrogenase                              | 71                 | Hs00230746_m1 | <i>REG4</i>    | regenerating islet-derived family; member 4                                           | 58                 |
| Hs00984632_gH | <i>DUT</i>     | deoxyuridine triphosphatase                                  | 87                 | Hs00420895_gH | <i>RPLP0</i>   | ribosomal protein; large; P0                                                          | 76                 |
| Hs00153451_m1 | <i>E2F1</i>    | E2F transcription factor 1                                   | 84                 | Hs00168784_m1 | <i>RRM1</i>    | ribonucleotide reductase M1                                                           | 78                 |
| Hs01099999_m1 | <i>EGF</i>     | epidermal growth factor                                      | 70                 | Hs00357247_g1 | <i>RRM2</i>    | ribonucleotide reductase M2                                                           | 79                 |
| Hs01076078_m1 | <i>EGFR</i>    | epidermal growth factor receptor                             | 60                 | Hs00231709_m1 | <i>RUNX3</i>   | runt-related transcription factor 3                                                   | 77                 |
| Hs01001580_m1 | <i>ERBB2</i>   | v-erb-b2 erythroblastic leukemia viral oncogene homolog 2    | 60                 | Hs00190328_m1 | <i>SEMA3B</i>  | immunoglobulin domain (Ig); short basic domain; secreted; (semaphorin) 3B             | 67                 |
| Hs01012158_m1 | <i>ERCC1</i>   | excision repair cross-complementing rodent repair deficiency | 55                 | Hs00234160_m1 | <i>SPARC</i>   | secreted protein; acidic; cysteine-rich (osteonectin)                                 | 76                 |
| Hs00914313_m1 | <i>EREG</i>    | epiregulin                                                   | 65                 | Hs00608187_m1 | <i>TGFA</i>    | transforming growth factor; alpha                                                     | 70                 |
| Hs00174860_m1 | <i>ESR1</i>    | estrogen receptor 1                                          | 62                 | Hs00962908_m1 | <i>THBS1</i>   | thrombospondin 1                                                                      | 59                 |
| Hs00544830_m1 | <i>EZH2</i>    | enhancer of zeste homolog 2 (Drosophila)                     | 86                 | Hs00243257_m1 | <i>TOP1</i>    | topoisomerase (DNA) I                                                                 | 101                |
| Hs00163653_m1 | <i>FAS</i>     | Fas (TNF receptor superfamily; member 6)                     | 85                 | Hs03063307_m1 | <i>TOP2A</i>   | topoisomerase (DNA) II alpha 170kDa                                                   | 72                 |
| Hs00909424_g1 | <i>FPGS</i>    | folylpolyglutamate synthase                                  | 85                 | Hs00157317_m1 | <i>TYMP</i>    | thymidine phosphorylase                                                               | 95                 |
| Hs00169255_m1 | <i>GADD45A</i> | growth arrest and DNA-damage-inducible; alpha;               | 123                | Hs00426586_m1 | <i>TYMS</i>    | thymidylate synthetase                                                                | 60                 |
| Hs00914163_m1 | <i>GGH</i>     | gamma-glutamyl hydrolase                                     | 91                 | Hs00923517_m1 | <i>UMPS</i>    | uridine monophosphate synthetase                                                      | 85                 |
| Hs00989184_m1 | <i>GZMA</i>    | granzyme A                                                   | 56                 | Hs01066247_m1 | <i>UPP1</i>    | uridine phosphorylase 1                                                               | 68                 |
| Hs02621185_s1 | <i>HDAC1</i>   | histone deacetylase 1                                        | 103                | Hs01003372_m1 | <i>VCAM1</i>   | vascular cell adhesion molecule 1                                                     | 62                 |
| Hs00180737_m1 | <i>HPSE</i>    | heparanase                                                   | 59                 | Hs00900055_m1 | <i>VEGFA</i>   | vascular endothelial growth factor A                                                  | 59                 |
| Hs00609566_m1 | <i>IGF1R</i>   | insulin-like growth factor 1 receptor                        | 64                 |               |                |                                                                                       |                    |

## Gastric Cancer

Title: Impact of insulin-like growth factor 1 receptor and amphiregulin expression on survival in patients with stage II/III gastric cancer enrolled in the Adjuvant Chemotherapy Trial of S-1 for Gastric Cancer

Wataru Ichikawa, M.D., Ph.D., Division of Medical Oncology, Showa University Fujigaoka Hospital, 1-30 Fujigaoka, Aoba-ku, Yokohama, Kanagawa, 227-8501 Japan.

Tel.: +81-45-971-1151 Fax: +81-45-974-6319 E-mail: wataru@med.showa-u.ac.jp

# Table S2 MIQE guidelines check list

| EXPERIMENTAL DESIGN | ITEM TO CHECK                                                        | IMPORTANCE | CHECKLIST |
|---------------------|----------------------------------------------------------------------|------------|-----------|
|                     | Definition of experimental and control groups                        | E          | Checked   |
|                     | Number within each group                                             | E          | Checked   |
|                     | Assay carried out by core lab or investigator's lab?                 | D          | Checked   |
|                     | Acknowledgement of authors' contributions                            | D          | Checked   |
|                     | <b>SAMPLE</b>                                                        |            |           |
|                     | Description                                                          | E          | Checked   |
|                     | Volume/mass of sample processed                                      | D          | Checked   |
|                     | Microdissection or macrodissection                                   | E          | Checked   |
|                     | Processing procedure                                                 | E          | Checked   |
|                     | If frozen - how and how quickly?                                     | E          | Checked   |
|                     | If fixed - with what, how quickly?                                   | E          | Checked   |
|                     | Sample storage conditions and duration (especially for FFPE samples) | E          | Checked   |
|                     | <b>NUCLEIC ACID EXTRACTION</b>                                       |            |           |
|                     | Procedure and/or instrumentation                                     | E          | Checked   |
|                     | Name of kit and details of any modifications                         | E          | Checked   |
|                     | Source of additional reagents used                                   | D          | Checked   |
|                     | Details of DNase or RNase treatment                                  | E          | Checked   |
|                     | Contamination assessment (DNA or RNA)                                | E          | Checked   |
|                     | Nucleic acid quantification                                          | E          | Checked   |
|                     | Instrument and method                                                | E          | Checked   |
|                     | Purity (A260/A280)                                                   | D          | NA        |
|                     | Yield                                                                | D          | NA        |
|                     | RNA integrity method/instrument                                      | E          | NA        |
|                     | RIN/RQI or Cq of 3' and 5' transcripts                               | E          | NA        |
|                     | Electrophoresis traces                                               | D          | NA        |
|                     | Inhibition testing (Cq dilutions, spike or other)                    | E          | NA        |
|                     | <b>REVERSE TRANSCRIPTION</b>                                         |            |           |
|                     | Complete reaction conditions                                         | E          | Checked   |
|                     | Amount of RNA and reaction volume                                    | E          | Checked   |
|                     | Priming oligonucleotides (if using GSP) and concentration            | E          | Checked   |
|                     | Reverse transcriptase and concentration                              | E          | Checked   |
|                     | Temperature and time                                                 | E          | Checked   |
|                     | Manufacturer of reagents and catalogue numbers                       | D          | Checked   |
|                     | Eg with and without RT                                               | D*         |           |
|                     | Storage conditions of cDNA                                           | D          | Checked   |
|                     | <b>qPCR TARGET INFORMATION</b>                                       |            |           |
|                     | If multiplex, efficiency and LOD of each assay.                      | E          | NA        |
|                     | Sequence accession number                                            | E          | Checked   |
|                     | Location of amplicon                                                 | D          |           |
|                     | Amplicon length                                                      | E          | Checked   |
|                     | In silico specificity screen (BLAST, etc)                            | E          | Checked   |
|                     | Pseudogenes, retrospseudogenes or other homologs?                    | D          |           |
|                     | Sequence alignment                                                   | D          |           |
|                     | Secondary structure analysis of amplicon                             | D          |           |
|                     | Location of each primer by exon or intron (if applicable)            | E          | Checked   |
|                     | What splice variants are targeted?                                   | E          | Checked   |
|                     | <b>qPCR OLIGONUCLEOTIDES</b>                                         |            |           |
|                     | Primer sequences                                                     | E          | Checked   |
|                     | RTPrimerDB Identification Number                                     | D          |           |
|                     | Probe sequences                                                      | D**        |           |
|                     | Location and identity of any modifications                           | E          | Checked   |
|                     | Manufacturer of oligonucleotides                                     | D          | Checked   |
|                     | Purification method                                                  | D          |           |
|                     | <b>qPCR PROTOCOL</b>                                                 |            |           |
|                     | Complete reaction conditions                                         | E          | Checked   |
|                     | Reaction volume and amount of cDNA/DNA                               | E          | Checked   |
|                     | Primer (probe), Mg++, and dNTP concentrations                        | E          | Checked   |
|                     | Polymerase identity and concentration                                | E          | Checked   |
|                     | Buffer/kit identity and manufacturer                                 | E          | Checked   |
|                     | Exact chemical constitution of the buffer                            | D          | Checked   |
|                     | Additives (SYBR Green 1, DMSO, etc.)                                 | E          | Checked   |
|                     | Manufacturer of plates/tubes and catalog number                      | D          | Checked   |
|                     | Complete thermocycling parameters                                    | E          | Checked   |
|                     | Reaction setup (manual/robotic)                                      | D          | Checked   |
|                     | Manufacturer of qPCR instrument                                      | E          | Checked   |
|                     | <b>qPCR VALIDATION</b>                                               |            |           |
|                     | Evidence of optimisation (from gradients)                            | D          |           |
|                     | Specificity (gel, sequence, melt, or digest)                         | E          | Checked   |
|                     | For SYBR Green 1, Cq of the NTC                                      | E          | Checked   |
|                     | Standard curves with slope and y-intercept                           | E          | Checked   |
|                     | PCR efficiency calculated from slope                                 | E          | Checked   |
|                     | Confidence interval for PCR efficiency or standard error             | D          |           |
|                     | r2 of standard curve                                                 | E          | Checked   |
|                     | Linear dynamic range                                                 | E          | Checked   |
|                     | Cq variation at lower limit                                          | E          | Checked   |
|                     | Confidence intervals throughout range                                | D          |           |
|                     | Evidence for limit of detection                                      | E          | Checked   |
|                     | PCR efficiency and LOD of each assay.                                | E          | Checked   |
|                     | <b>DATA ANALYSIS</b>                                                 |            |           |
|                     | qPCR analysis program (source, version)                              | E          | Checked   |
|                     | Cq method determination                                              | E          | Checked   |
|                     | Outlier identification and disposition                               | E          | Checked   |
|                     | Results of NTCs                                                      | E          | Checked   |
|                     | Justification of number and choice of reference genes                | E          | Checked   |
|                     | Description of normalisation method                                  | E          | Checked   |
|                     | Number and concordance of biological replicates                      | D          | Checked   |
|                     | Number and stage (RT or qPCR) of technical replicates                | E          | Checked   |
|                     | Repeatability (intra-assay variation)                                | E          | Checked   |
|                     | Reproducibility (inter-assay variation, %CV)                         | D          |           |
|                     | Power analysis                                                       | D          | NA        |
|                     | Statistical methods for result significance                          | E          | Checked   |
|                     | Software (source, version)                                           | E          | Checked   |
|                     | Eg. or raw data submission using RDML                                | D          |           |

**Memo**

Surgely only arm vs. S-1 treatment arm  
 Surgely only (414) vs. S-1 treatment (412)  
 Faico biosystems Co., Ltd. Kyoto-City, Japan

FFPE specimens (10um thick / up to 5 slices)  
 Macrodissected samples

various period of time of storage (65 institutions/ archived block )

Rnaseasy mini kit (QIAGEN)  
 none  
 Dnase I digestion on spin column  
 Gene Specific probe / primer design

Nano-drop system  
 NA  
 NA  
 NA  
 NA  
 NA

According to the manufacture's protocol  
 2.5ug total RNA  
 Random hexamer (High-Capacity cDNA Reverse Transcription kits(Applied Biosystems)  
 According to kit protocol  
 25degree 10min, 37 degree 2hours, 85degree 5 sec  
 ABI Catalogue number = 4368814 / 200 reaction

below - 20 degree celsius

NA

Described in supplemental table

Described in supplemental table  
 ABI designed taqman assay (Low Density Card) were employed.  
 92.1% of assay are "m1", namely mRNA specific, whose probe spans an exon-exon junction and will not detect genomic DNA.

3.6% of assay are "g1", whose probe spans an exon-exon junction, however, the assay may detect genomic DNA if present in the sample.

4.2% of assay are "s1", whose primers and probes are designed within a single exon, such assays will, by devinition detect genomic DNA.

Exon

As described above

Sequence information is not disclosed by ABI  
 Sequence information is not disclosed by ABI  
 Sequence information is not disclosed by ABI  
 Sequence information is not disclosed by ABI

According to the manufacture's protocol  
 1ng cDNA / 1ul of reaction mixture, Reaction volume per well = 3ul  
 Not disclosed by ABI  
 Primer (900nM), Probe (250nM)  
 TaqMan Gene Expression Master Mix (Parts Number : 4369016)  
 Not disclosed by ABI

TaqMan Arrays (384-well micro Fluidic cards Parts Number = MFC\_384)  
 2 min at 50°C and 10 min at 94.5°C for 40 cycles (30 s at 97°C and 1 min at 59.7°C).  
 Manual  
 7900HT Fast Real-Time PCR System

This issue may not be suitable for 384-well micro Fluidic cards system. However Applied Biosystems recommend double-delta Ct method for this system, namely, standard curve and PCR efficacy are well controlled in the systems.  
 NTC well assigned

This issue may not be suitable for 384-well micro Fluidic cards system. However Applied Biosystems recommend double-delta Ct method for this system, namely, slope of standard curve are nearly -.332 for all primers.

This issue may not be suitable for 384-well micro Fluidic cards system. However Applied Biosystems recommend double-delta Ct method for this system, therefore, efficacy of reaction are nearly 100% for all primers.

Double delta Ct method employed (ABI confirmed)  
 Not multiplex assay

Sequence dilution software (ABI)  
 Auto threshold  
 Outlier rejection enabled on the software.  
 No amplification in NTC confirmed  
 Eight house-keeping gene were utilized. (ACTB, B2M, GAPDH, GUSB, HMBS, RPLP0, YWHA2 and 18S)  
 Geometric mean of eight house-keeping genes were employed followed by log2 transformation.  
 Ct differences of duplicated data were checked.  
 Ct differences of duplicated data were checked.  
 Ct differences of duplicated data were checked.

Exploratory study design (not priory power calculation)  
 Cox proportional hazard model, Log-Rank test, (Benjamini and Hochberg false discovery rate (FDR) controlling procedure)  
 SAS ver 8 & JMP software (SAS institute, JAPAN)

**Table 1.** MIQE checklist for authors, reviewers and editors. All essential information (E) must be submitted with the manuscript. Desirable

information (D) should be submitted if available. If using primers obtained from RTPrimerDB, information on qPCR target, oligonucleotides, protocols and validation is available from that source.

\*\* Assessing the absence of DNA using a no RT assay is essential when first extracting RNA. Once the sample has been validated as RNA-free, inclusion of a no-RT control is desirable, but no longer essential.

**Table S3**

| Characteristics of the patients     | S-1 (n = 415) | Surgery only (n = 414) | P value <sup>a</sup> |
|-------------------------------------|---------------|------------------------|----------------------|
| Sex, n (%)                          |               |                        | 0.9                  |
| Male                                | 282 (68.0)    | 283 (68.4)             |                      |
| Female                              | 133 (32.0)    | 131 (31.6)             |                      |
| Age, n (%)                          |               |                        | 0.72                 |
| <60                                 | 160 (38.6)    | 158 (38.2)             |                      |
| 60–69                               | 149 (35.9)    | 161 (38.9)             |                      |
| 70–80                               | 106 (25.5)    | 95 (22.9)              |                      |
| Median, y                           | 63            | 62                     |                      |
| Range, y                            | 27–80         | 33–80                  |                      |
| Tumor stage, n (%)                  |               |                        | 0.93                 |
| T1                                  | 1 (0)         | 0 (0)                  |                      |
| T2                                  | 222 (53.5)    | 223 (53.9)             |                      |
| T3                                  | 180 (43.4)    | 182 (44.0)             |                      |
| T4                                  | 12 (2.9)      | 9 (2.2)                |                      |
| Nodal stage, n (%) <sup>b</sup>     |               |                        | 0.52                 |
| N0                                  | 40 (9.6)      | 52 (12.6)              |                      |
| N1                                  | 233 (56.1)    | 222 (53.6)             |                      |
| N2                                  | 142 (34.2)    | 140 (33.8)             |                      |
| N3                                  | 0 (0)         | 0 (0)                  |                      |
| Lymph-node metastases, n (%)        |               | 0.18                   |                      |
| 0                                   | 40 (9.6)      | 52 (12.6)              |                      |
| 1–6                                 | 254 (61.2)    | 254 (61.4)             |                      |
| 7–15                                | 97 (23.4)     | 85 (20.5)              |                      |
| ≥16                                 | 24 (5.8)      | 23 (5.6)               |                      |
| Cancer stage, n (%) <sup>c</sup>    |               |                        | 0.48                 |
| II                                  | 183 (44.1)    | 189 (45.7)             |                      |
| IIIA                                | 159 (38.3)    | 162 (39.1)             |                      |
| IIIB                                | 73 (17.6)     | 63 (15.2)              |                      |
| IV                                  | 0 (0)         | 0 (0)                  |                      |
| Histologic type, n (%) <sup>d</sup> |               |                        | 0.91                 |
| Differentiated                      | 166 (40.0)    | 166 (40.1)             |                      |
| Undifferentiated                    | 249 (60.0)    | 245 (59.2)             |                      |

a) P values for sex were calculated with the use of the  $\chi^2$  test. P values for age, tumor stage, nodal stage, number of lymph-node metastases, cancer stage (Japanese classification), and histologic type were calculated with the use of the Wilcoxon test.

b) Nodal stages according to the Japanese classification were defined as follows: N0, no evidence of lymph node metastasis; N1, metastasis to group 1 lymph nodes; N2, metastasis to group 2 lymph nodes; N3, metastasis to group 3 lymph nodes. Groups 1, 2, and 3 are regional lymph node classifications defined according to the location of the primary tumor and are based on the results of studies of lymphatic flow at various tumor sites and the observed survival associated with metastasis at each nodal station (i.e., position in relation to primary node).

c) Cancer stages according to the Japanese classification were defined as follows: stage IA, T1N0; stage IB, T1N1 or T2N0; stage II, T1N2, T2N1, or T3N0; stage IIIA, T2N2, T3N1, or T4N0; stage IIIB, T3N2 or T4N1; stage IV, T4N2, any T stage with N3, or distant metastasis.

d) In entire population of ACTS-GC, histologic type was classified among eligible patients (n = 1,034). In the surgery-only group of biomarker study population, cancers could not be classified as differentiated or undifferentiated in 3 patients.

## Table S4 Univariate analysis of RFS for all patients

| Gene Symbol    | Log-Rank P | BH-FDR_P | Hazard ratio | 95%Low | 95%High |
|----------------|------------|----------|--------------|--------|---------|
| <i>IGF1R</i>   | 1.30E-04   | 0.007    | 1.539        | 1.232  | 1.922   |
| <i>THBS1</i>   | 2.13E-03   | 0.117    | 1.413        | 1.132  | 1.763   |
| <i>ERBB2</i>   | 2.71E-03   | 0.146    | 1.40         | 1.12   | 1.74    |
| <i>AREG</i>    | 5.88E-03   | 0.312    | 0.73         | 0.59   | 0.92    |
| <i>LRP5</i>    | 8.33E-03   | 0.433    | 1.35         | 1.08   | 1.68    |
| <i>EGFR</i>    | 1.01E-02   | 0.517    | 1.34         | 1.07   | 1.68    |
| <i>GZMA</i>    | 1.80E-02   | 0.900    | 0.76         | 0.60   | 0.95    |
| <i>EZH2</i>    | 4.98E-02   | 0.920    | 0.80         | 0.63   | 1.00    |
| <i>MAPT</i>    | 5.33E-02   | 0.920    | 1.28         | 1.00   | 1.65    |
| <i>PTEN</i>    | 5.45E-02   | 0.920    | 0.81         | 0.65   | 1.00    |
| <i>FAS</i>     | 5.87E-02   | 0.920    | 0.80         | 0.64   | 1.01    |
| <i>ANGPT2</i>  | 6.16E-02   | 0.920    | 1.24         | 0.99   | 1.56    |
| <i>TGFA</i>    | 7.20E-02   | 0.920    | 1.23         | 0.98   | 1.55    |
| <i>MUC2</i>    | 8.36E-02   | 0.920    | 0.81         | 0.63   | 1.03    |
| <i>CAV1</i>    | 8.55E-02   | 0.920    | 1.21         | 0.97   | 1.51    |
| <i>PECAM1</i>  | 9.57E-02   | 0.920    | 1.20         | 0.97   | 1.50    |
| <i>LDHA</i>    | 1.02E-01   | 0.920    | 0.83         | 0.67   | 1.04    |
| <i>TYMP</i>    | 1.05E-01   | 0.920    | 0.83         | 0.67   | 1.04    |
| <i>SPARC</i>   | 1.07E-01   | 0.920    | 1.20         | 0.96   | 1.49    |
| <i>UMPS</i>    | 1.23E-01   | 0.920    | 0.84         | 0.67   | 1.05    |
| <i>UPP1</i>    | 1.28E-01   | 0.920    | 0.84         | 0.67   | 1.05    |
| <i>ABCC1</i>   | 1.32E-01   | 0.920    | 1.19         | 0.95   | 1.48    |
| <i>ERCC1</i>   | 1.35E-01   | 0.920    | 1.18         | 0.95   | 1.47    |
| <i>RUNX3</i>   | 1.63E-01   | 0.920    | 0.85         | 0.68   | 1.07    |
| <i>GADD45A</i> | 2.05E-01   | 0.920    | 1.18         | 0.91   | 1.52    |
| <i>DHFR</i>    | 2.06E-01   | 0.920    | 0.87         | 0.70   | 1.08    |
| <i>DAPK1</i>   | 2.07E-01   | 0.920    | 1.16         | 0.92   | 1.45    |
| <i>TOP1</i>    | 2.15E-01   | 0.920    | 0.87         | 0.70   | 1.08    |

| Gene Symbol    | Log-Rank P | BH-FDR_P | Hazard ratio | 95%Low | 95%High |
|----------------|------------|----------|--------------|--------|---------|
| <i>DUT</i>     | 2.29E-01   | 0.920    | 0.87         | 0.70   | 1.09    |
| <i>TYMS</i>    | 2.41E-01   | 0.920    | 0.88         | 0.70   | 1.09    |
| <i>PLA2G2A</i> | 2.43E-01   | 0.920    | 0.85         | 0.66   | 1.11    |
| <i>PTGS2</i>   | 3.48E-01   | 0.920    | 0.90         | 0.72   | 1.12    |
| <i>EREG</i>    | 3.54E-01   | 0.920    | 0.88         | 0.68   | 1.15    |
| <i>HPSE</i>    | 4.42E-01   | 0.920    | 0.92         | 0.73   | 1.14    |
| <i>GGH</i>     | 4.45E-01   | 0.920    | 1.09         | 0.87   | 1.38    |
| <i>FPGS</i>    | 4.54E-01   | 0.920    | 1.09         | 0.87   | 1.36    |
| <i>ABCB1</i>   | 4.81E-01   | 0.920    | 0.92         | 0.73   | 1.16    |
| <i>MLH1</i>    | 4.98E-01   | 0.920    | 0.92         | 0.73   | 1.16    |
| <i>TOP2A</i>   | 5.32E-01   | 0.920    | 1.07         | 0.86   | 1.34    |
| <i>ITGB3</i>   | 5.52E-01   | 0.920    | 1.07         | 0.86   | 1.33    |
| <i>ESR1</i>    | 5.79E-01   | 0.920    | 0.94         | 0.75   | 1.18    |
| <i>VEGFA</i>   | 5.88E-01   | 0.920    | 1.06         | 0.85   | 1.32    |
| <i>RRM1</i>    | 6.30E-01   | 0.920    | 1.06         | 0.85   | 1.32    |
| <i>REG4</i>    | 6.45E-01   | 0.920    | 0.95         | 0.76   | 1.19    |
| <i>HDAC1</i>   | 6.68E-01   | 0.920    | 0.95         | 0.76   | 1.19    |
| <i>BCL2</i>    | 6.78E-01   | 0.920    | 1.05         | 0.83   | 1.34    |
| <i>DPYD</i>    | 6.87E-01   | 0.920    | 1.05         | 0.84   | 1.31    |
| <i>BCL2L11</i> | 6.98E-01   | 0.920    | 0.95         | 0.71   | 1.25    |
| <i>RRM2</i>    | 7.45E-01   | 0.920    | 0.96         | 0.77   | 1.20    |
| <i>APC</i>     | 8.29E-01   | 0.920    | 1.02         | 0.82   | 1.28    |
| <i>PLAU</i>    | 8.31E-01   | 0.920    | 0.98         | 0.78   | 1.22    |
| <i>E2F1</i>    | 8.39E-01   | 0.920    | 0.98         | 0.78   | 1.23    |
| <i>MGMT</i>    | 8.96E-01   | 0.920    | 0.99         | 0.79   | 1.23    |
| <i>BAX</i>     | 9.02E-01   | 0.920    | 0.99         | 0.79   | 1.23    |
| <i>MTHFR</i>   | 9.17E-01   | 0.920    | 1.01         | 0.80   | 1.28    |
| <i>VCAM1</i>   | 9.20E-01   | 0.920    | 1.01         | 0.81   | 1.26    |

BH-FDR\_P : Benjamini & Hochberg false discovery rate

**Table S5 Univariate analysis of RFS for surgery-only arm**

| Gene Symbol    | Log-Rank P | BH-FDR_P | Hazard ratio | 95%Low | 95%High |
|----------------|------------|----------|--------------|--------|---------|
| <i>IGF1R</i>   | 3.58E-04   | 0.020    | 1.692        | 1.263  | 2.266   |
| <i>ERBB2</i>   | 8.08E-03   | 0.444    | 1.475        | 1.104  | 1.970   |
| <i>EZH2</i>    | 1.24E-02   | 0.669    | 0.68         | 0.51   | 0.92    |
| <i>ERCC1</i>   | 1.50E-02   | 0.795    | 1.43         | 1.07   | 1.91    |
| <i>LRP5</i>    | 2.19E-02   | 0.980    | 1.40         | 1.05   | 1.87    |
| <i>THBS1</i>   | 3.28E-02   | 0.980    | 1.37         | 1.02   | 1.83    |
| <i>LDHA</i>    | 3.38E-02   | 0.980    | 0.73         | 0.55   | 0.98    |
| <i>AREG</i>    | 5.06E-02   | 0.980    | 0.75         | 0.56   | 1.00    |
| <i>ANGPT2</i>  | 6.18E-02   | 0.980    | 1.33         | 0.99   | 1.80    |
| <i>TGFA</i>    | 7.11E-02   | 0.980    | 1.32         | 0.98   | 1.78    |
| <i>EGFR</i>    | 8.11E-02   | 0.980    | 1.30         | 0.97   | 1.73    |
| <i>PTEN</i>    | 8.27E-02   | 0.980    | 0.78         | 0.58   | 1.03    |
| <i>APC</i>     | 9.41E-02   | 0.980    | 1.28         | 0.96   | 1.71    |
| <i>HPSE</i>    | 1.07E-01   | 0.980    | 0.79         | 0.59   | 1.05    |
| <i>MAPT</i>    | 1.22E-01   | 0.980    | 1.30         | 0.93   | 1.82    |
| <i>PLA2G2A</i> | 1.42E-01   | 0.980    | 0.77         | 0.54   | 1.09    |
| <i>ABCC1</i>   | 1.43E-01   | 0.980    | 1.24         | 0.93   | 1.67    |
| <i>MUC2</i>    | 1.70E-01   | 0.980    | 0.80         | 0.57   | 1.10    |
| <i>EREG</i>    | 1.82E-01   | 0.980    | 0.79         | 0.56   | 1.12    |
| <i>E2F1</i>    | 1.83E-01   | 0.980    | 1.22         | 0.91   | 1.65    |
| <i>DHFR</i>    | 1.87E-01   | 0.980    | 0.82         | 0.62   | 1.10    |
| <i>UPP1</i>    | 1.95E-01   | 0.980    | 0.83         | 0.62   | 1.10    |
| <i>SPARC</i>   | 2.11E-01   | 0.980    | 1.20         | 0.90   | 1.60    |
| <i>FAS</i>     | 2.14E-01   | 0.980    | 0.83         | 0.61   | 1.12    |
| <i>TOP1</i>    | 2.24E-01   | 0.980    | 0.84         | 0.63   | 1.12    |
| <i>GZMA</i>    | 2.37E-01   | 0.980    | 0.83         | 0.61   | 1.13    |
| <i>UMPS</i>    | 2.39E-01   | 0.980    | 0.84         | 0.62   | 1.13    |
| <i>TYMP</i>    | 2.54E-01   | 0.980    | 0.84         | 0.63   | 1.13    |

| Gene Symbol    | Log-Rank P | BH-FDR_P | Hazard ratio | 95%Low | 95%High |
|----------------|------------|----------|--------------|--------|---------|
| <i>MTHFR</i>   | 3.08E-01   | 0.980    | 1.18         | 0.86   | 1.61    |
| <i>FPGS</i>    | 3.15E-01   | 0.980    | 1.16         | 0.87   | 1.55    |
| <i>RRM2</i>    | 3.43E-01   | 0.980    | 0.87         | 0.65   | 1.16    |
| <i>BCL2</i>    | 3.52E-01   | 0.980    | 1.17         | 0.84   | 1.61    |
| <i>CAV1</i>    | 3.62E-01   | 0.980    | 1.14         | 0.86   | 1.52    |
| <i>PTGS2</i>   | 3.65E-01   | 0.980    | 0.87         | 0.65   | 1.17    |
| <i>HDAC1</i>   | 3.69E-01   | 0.980    | 0.88         | 0.66   | 1.17    |
| <i>DAPK1</i>   | 3.82E-01   | 0.980    | 1.14         | 0.85   | 1.54    |
| <i>DUT</i>     | 3.92E-01   | 0.980    | 0.88         | 0.66   | 1.18    |
| <i>ABCB1</i>   | 3.97E-01   | 0.980    | 1.14         | 0.84   | 1.55    |
| <i>REG4</i>    | 4.07E-01   | 0.980    | 0.88         | 0.66   | 1.19    |
| <i>VEGFA</i>   | 4.10E-01   | 0.980    | 1.13         | 0.85   | 1.50    |
| <i>GGH</i>     | 4.35E-01   | 0.980    | 1.13         | 0.83   | 1.53    |
| <i>ESR1</i>    | 4.45E-01   | 0.980    | 0.89         | 0.66   | 1.20    |
| <i>GADD45A</i> | 5.98E-01   | 0.980    | 1.09         | 0.79   | 1.52    |
| <i>PECAM1</i>  | 6.23E-01   | 0.980    | 1.07         | 0.81   | 1.43    |
| <i>ITGB3</i>   | 6.52E-01   | 0.980    | 1.07         | 0.80   | 1.42    |
| <i>MGMT</i>    | 7.03E-01   | 0.980    | 1.06         | 0.79   | 1.42    |
| <i>DPYD</i>    | 7.13E-01   | 0.980    | 0.95         | 0.71   | 1.26    |
| <i>TYMS</i>    | 7.23E-01   | 0.980    | 0.95         | 0.71   | 1.27    |
| <i>PLAU</i>    | 7.79E-01   | 0.980    | 0.96         | 0.72   | 1.28    |
| <i>RRM1</i>    | 8.11E-01   | 0.980    | 1.04         | 0.78   | 1.38    |
| <i>TOP2A</i>   | 8.72E-01   | 0.980    | 1.02         | 0.77   | 1.37    |
| <i>BCL2L11</i> | 9.43E-01   | 0.980    | 0.99         | 0.68   | 1.42    |
| <i>VCAM1</i>   | 9.57E-01   | 0.980    | 1.01         | 0.76   | 1.34    |
| <i>RUNX3</i>   | 9.57E-01   | 0.980    | 0.99         | 0.74   | 1.33    |
| <i>MLH1</i>    | 9.70E-01   | 0.980    | 1.01         | 0.75   | 1.36    |
| <i>BAX</i>     | 9.80E-01   | 0.980    | 1.00         | 0.75   | 1.34    |

BH-FDR\_P : Benjamini & Hochberg false discovery rate

**Table S6 Univariate analysis of RFS (44 genes screened by LDA on publicly available dataset; GSE26253)**

| Gene           | Hazard Ratio | HR:<br>95%CI-low | HR:<br>95%CI-high | Log-Rank P | FDR P | 3-yr RFS<br>(Low-group) | 3-yr RFS<br>(High-group) |
|----------------|--------------|------------------|-------------------|------------|-------|-------------------------|--------------------------|
| <i>SPARC</i>   | 1.816        | 1.255            | 2.629             | 0.001      | 0.058 | 76.3                    | 59.9                     |
| <i>EZH2</i>    | 0.628        | 0.436            | 0.906             | 0.012      | 0.262 | 62.2                    | 73.8                     |
| <i>IGF1R</i>   | 1.489        | 1.037            | 2.139             | 0.030      | 0.336 | 74.6                    | 61.3                     |
| <i>E2F1</i>    | 0.671        | 0.466            | 0.966             | 0.031      | 0.336 | 65.0                    | 71.1                     |
| <i>RUNX3</i>   | 0.711        | 0.495            | 1.020             | 0.063      | 0.414 | 65.9                    | 70.0                     |
| <i>DHFR</i>    | 1.397        | 0.974            | 2.004             | 0.067      | 0.414 | 72.8                    | 63.0                     |
| <i>RRM2</i>    | 0.720        | 0.502            | 1.035             | 0.074      | 0.414 | 62.6                    | 73.6                     |
| <i>PTGS2</i>   | 1.388        | 0.965            | 1.995             | 0.075      | 0.414 | 71.0                    | 65.1                     |
| <i>DUT</i>     | 1.353        | 0.943            | 1.942             | 0.099      | 0.485 | 71.5                    | 64.5                     |
| <i>ABCC1</i>   | 0.751        | 0.524            | 1.078             | 0.119      | 0.525 | 65.4                    | 70.6                     |
| <i>MTHFR</i>   | 1.311        | 0.915            | 1.880             | 0.138      | 0.542 | 70.3                    | 65.5                     |
| <i>VCAM1</i>   | 1.293        | 0.901            | 1.853             | 0.162      | 0.542 | 70.9                    | 65.2                     |
| <i>REG4</i>    | 0.779        | 0.544            | 1.117             | 0.173      | 0.542 | 64.6                    | 71.4                     |
| <i>FAS</i>     | 1.272        | 0.887            | 1.824             | 0.190      | 0.542 | 72.4                    | 63.7                     |
| <i>VEGFA</i>   | 1.253        | 0.875            | 1.794             | 0.217      | 0.542 | 73.1                    | 62.8                     |
| <i>GZMA</i>    | 0.799        | 0.557            | 1.145             | 0.220      | 0.542 | 64.6                    | 71.6                     |
| <i>ANGPT2</i>  | 1.250        | 0.873            | 1.790             | 0.222      | 0.542 | 71.5                    | 64.5                     |
| <i>FPGS</i>    | 0.800        | 0.558            | 1.146             | 0.222      | 0.542 | 63.3                    | 72.8                     |
| <i>TOP2A</i>   | 0.813        | 0.567            | 1.165             | 0.258      | 0.598 | 64.8                    | 71.4                     |
| <i>PLA2G2A</i> | 0.825        | 0.576            | 1.181             | 0.292      | 0.618 | 67.3                    | 68.6                     |
| <i>ERCC1</i>   | 1.209        | 0.844            | 1.731             | 0.299      | 0.618 | 71.6                    | 64.5                     |
| <i>PLAU</i>    | 1.204        | 0.841            | 1.722             | 0.309      | 0.618 | 71.8                    | 64.1                     |
| <i>LRP5</i>    | 0.835        | 0.583            | 1.197             | 0.325      | 0.622 | 66.6                    | 69.5                     |
| <i>DAPK1</i>   | 1.168        | 0.816            | 1.672             | 0.396      | 0.726 | 70.5                    | 65.5                     |
| <i>UPP1</i>    | 0.871        | 0.608            | 1.246             | 0.449      | 0.737 | 65.4                    | 70.5                     |
| <i>MGMT</i>    | 1.148        | 0.802            | 1.643             | 0.450      | 0.737 | 69.5                    | 66.5                     |
| <i>LDHA</i>    | 0.872        | 0.609            | 1.249             | 0.454      | 0.737 | 66.5                    | 69.5                     |
| <i>ITGB3</i>   | 1.141        | 0.797            | 1.634             | 0.469      | 0.737 | 69.5                    | 66.5                     |
| <i>TYMS</i>    | 0.891        | 0.622            | 1.274             | 0.526      | 0.764 | 63.8                    | 72.3                     |
| <i>CAV1</i>    | 1.117        | 0.781            | 1.600             | 0.543      | 0.764 | 69.2                    | 66.8                     |
| <i>BCL2L11</i> | 1.115        | 0.779            | 1.595             | 0.552      | 0.764 | 72.7                    | 63.2                     |
| <i>PTEN</i>    | 1.114        | 0.778            | 1.594             | 0.556      | 0.764 | 69.6                    | 66.4                     |
| <i>DPYD</i>    | 1.106        | 0.773            | 1.583             | 0.581      | 0.771 | 67.7                    | 68.3                     |
| <i>PECAM1</i>  | 1.102        | 0.770            | 1.577             | 0.596      | 0.771 | 68.7                    | 67.3                     |
| <i>BCL2</i>    | 0.945        | 0.661            | 1.352             | 0.757      | 0.926 | 66.5                    | 69.5                     |
| <i>ERBB2</i>   | 1.058        | 0.740            | 1.514             | 0.757      | 0.926 | 68.4                    | 67.6                     |
| <i>EGFR</i>    | 0.968        | 0.677            | 1.385             | 0.861      | 0.973 | 65.6                    | 70.4                     |
| <i>GADD45A</i> | 1.030        | 0.720            | 1.474             | 0.871      | 0.973 | 66.8                    | 69.1                     |
| <i>HDAC1</i>   | 1.027        | 0.718            | 1.469             | 0.884      | 0.973 | 70.2                    | 65.8                     |
| <i>THBS1</i>   | 1.020        | 0.713            | 1.460             | 0.913      | 0.973 | 67.0                    | 69.0                     |
| <i>GGH</i>     | 1.015        | 0.710            | 1.452             | 0.934      | 0.973 | 69.0                    | 67.0                     |
| <i>MLH1</i>    | 1.010        | 0.706            | 1.444             | 0.958      | 0.973 | 69.8                    | 66.1                     |
| <i>BAX</i>     | 1.007        | 0.704            | 1.441             | 0.968      | 0.973 | 68.4                    | 67.6                     |
| <i>RRM1</i>    | 0.994        | 0.695            | 1.421             | 0.973      | 0.973 | 66.4                    | 69.6                     |
